# Supplementary material for: Deciphering the Molecular Signature of Human Hyalocytes in Relation to Other Innate Immune Cell Populations
Source: PubMed Central journal article supplement (PMC8934546; doi:10.1167/iovs.63.3.9), 2022-03-10
Supplement: iovs-63-3-9_s001.pdf [file iovs-63-3-9_s001.pdf]

## Supplement

### Deciphering the molecular signature of human hyalocytes in relation to other innate immune cell populations

Julian Wolf<sup>1</sup>, Stefaniya Boneva<sup>1</sup>, Dennis-Dominik Rosmus<sup>2</sup>, Hansjürgen Agostini<sup>1</sup>, Günther Schlunck<sup>1</sup>, Peter Wieghofer<sup>2,3</sup>, Anja Schlecht<sup>1,4</sup> \* and Clemens Lange<sup>1,5\*</sup>

<sup>1</sup> Eye Center, Medical Center, Faculty of Medicine, University of Freiburg, Germany

<sup>2</sup> Institute of Anatomy, University of Leipzig, Germany

<sup>3</sup> Cellular Neuroanatomy, Institute of Theoretical Medicine, Medical Faculty, University of Augsburg, Germany

<sup>4</sup> Institute of Anatomy and Cell Biology, Julius-Maximilians-University Wuerzburg, Germany

<sup>5</sup> Ophtha-Lab, Department of Ophthalmology, St. Franziskus Hospital, Muenster, Germany

\* contributed equally as senior authors

**Corresponding author:** Clemens Lange MD PhD, Ophtha-Lab, Department of Ophthalmology, St. Franziskus Hospital, Hohenzollernring 74, 48145 Muenster, Germany, tel. +49 251 9352727, fax +49 251 9351111, e-mail: clemens.lange@augenfranziskus.de

**Patient 1**  
 Age: 53.4 years      Sex: female  
 Diagnosis: iris melanoma, suspected invasion of iridocorneal angle, secondary glaucoma, iris pigment epithelium intact, vitreous free, fundus without pathological findings  
 Isolated cells: hyalocytes  
 retinal microglia  
 classical monocytes  
 intermediate monocytes  
 non classical monocytes

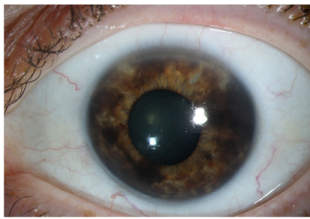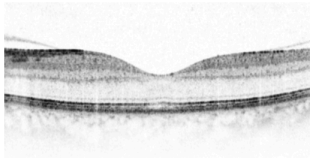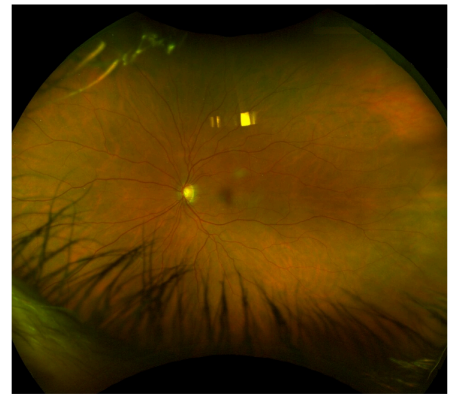

**Patient 2**  
 Age: 51.9 years  
 Sex: male  
 Diagnosis: choroidal melanoma, collar-button configuration vitreous free, exsudative retinal detachment  
 Isolated cells: hyalocytes  
 classical monocytes  
 intermediate monocytes  
 non classical monocytes

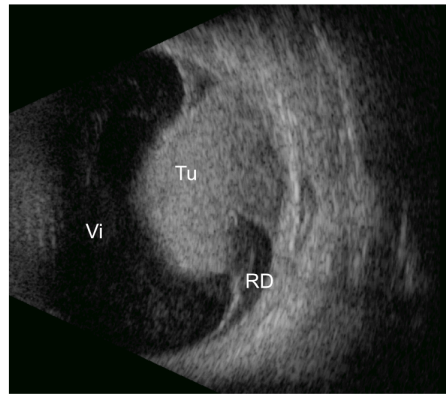

**Patient 3**  
 Age: 81.8 years  
 Sex: male  
 Diagnosis: choroidal melanoma, large tumor, scleral penetration, no vitreous humor available  
 Isolated cells: retinal microglia

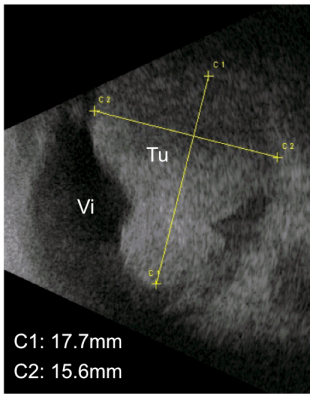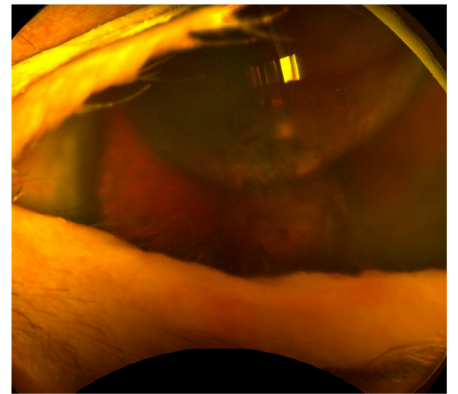

**Patient 4**  
 Age: 93.8 years  
 Sex: female  
 Diagnosis: ciliary body melanoma, penetration into vortex veins, vitreous and anterior chamber (angle), exsudative retinal detachment  
 Isolated cells: hyalocytes  
 retinal microglia

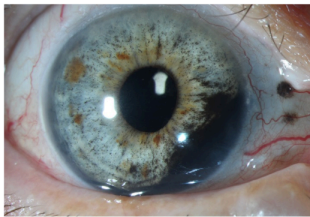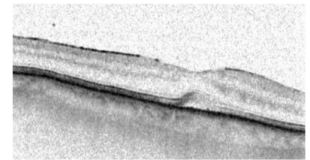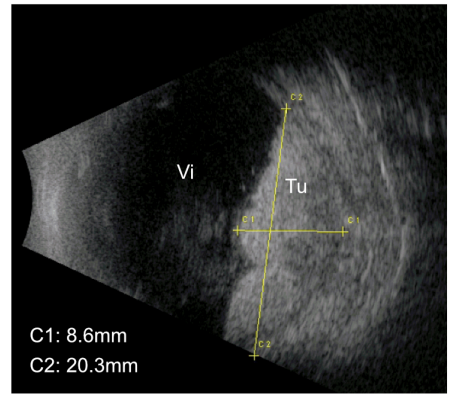

**Patient 5**  
 Age: 55.8 years  
 Sex: male  
 Diagnosis: choroidal melanoma, monosomie 3, vitreous free, exsudative retinal detachment  
 Isolated cells: hyalocytes  
 retinal microglia  
 classical monocytes

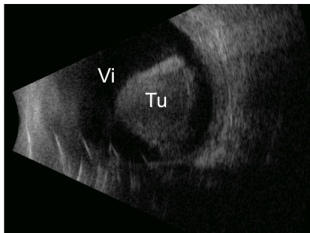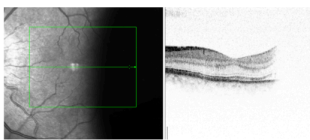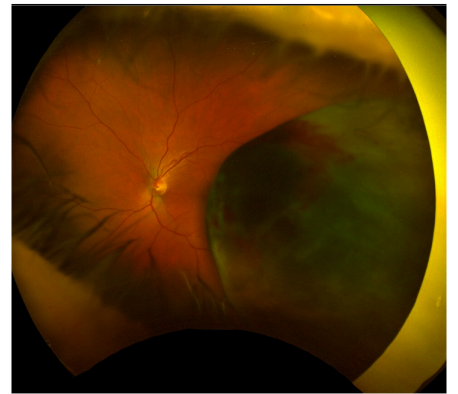

Patient 6  
 Age: 61.4 years  
 Sex: male  
 Diagnosis: ciliary body melanoma, vitreous hemorrhage, exudative retinal detachment  
 Isolated cells: hyalocytes  
 retinal microglia

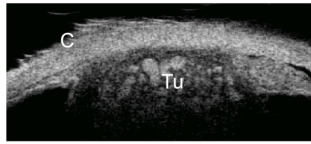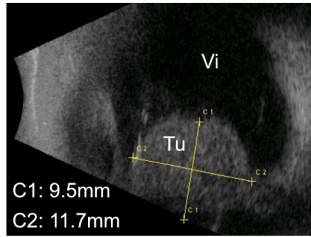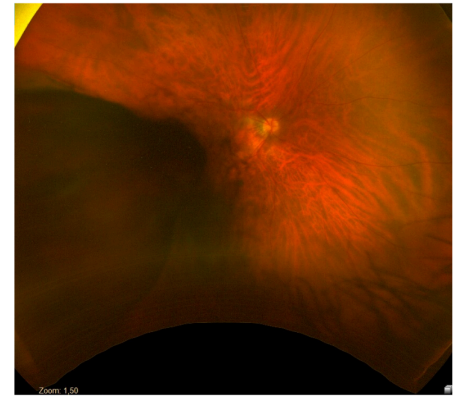

Patient 7  
 Age: 60.2 years  
 Sex: male  
 Diagnosis: naevus of the eyelid  
 Isolated cells: classical monocytes  
 intermediate monocytes  
 non classical monocytes

Patient 8  
 Age: 84.2 years  
 Sex: male  
 Diagnosis: chronic blepharitis  
 Isolated cells: classical monocytes  
 intermediate monocytes  
 non classical monocytes

Patient 9  
 Age: 77.3 years  
 Sex: female  
 Diagnosis: functional nasolacrimal duct obstruction  
 Isolated cells: classical monocytes  
 intermediate monocytes  
 non classical monocytes

**Supplementary figure 1:** Summary of patients included in the study. Abbreviations: C: cornea, RD: retinal detachment, Tu: tumor, Vi: vitreous.

### A Hyalocytes

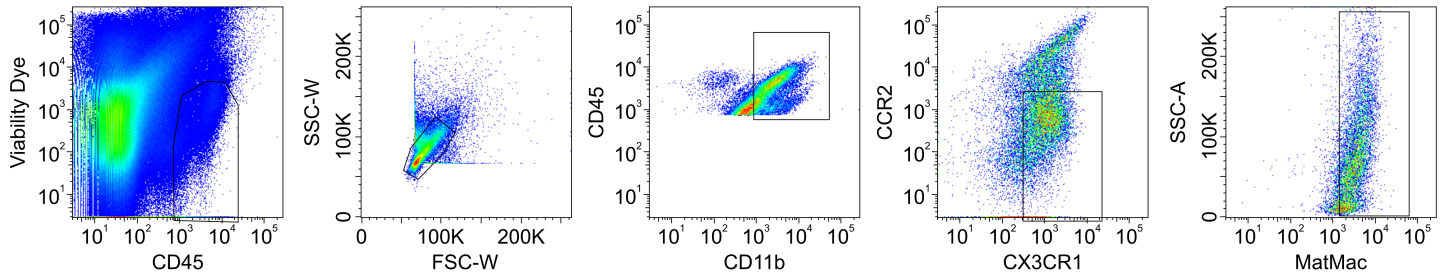

### B Retinal microglia

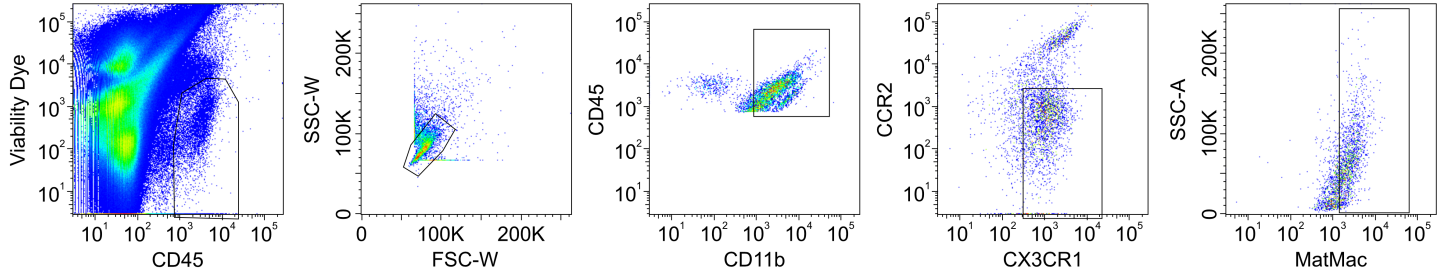

### C Monocytes

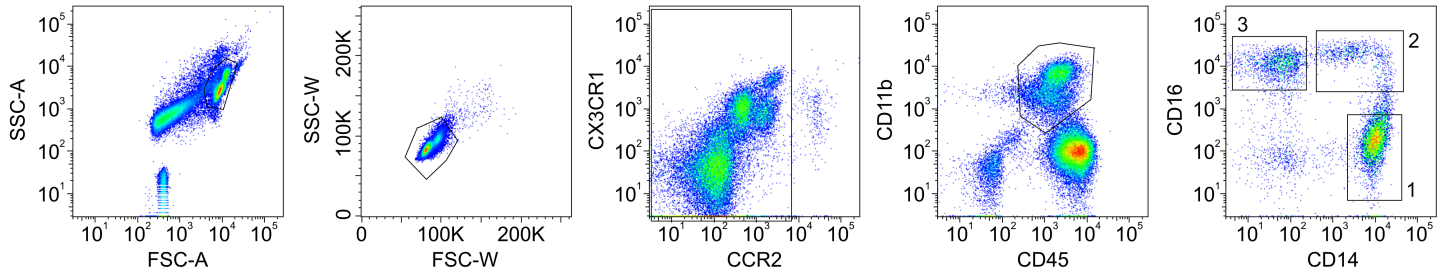

**Supplementary figure 2:** Flow cytometric gating strategy for (A) human hyalocytes from the vitreous and (B) human retinal microglia from retinal tissue characterized as CD45<sup>+</sup> CD11b<sup>+</sup> CX<sub>3</sub>CR1<sup>+</sup> CCR2<sup>-</sup> MatMac<sup>+</sup> cells. Cell populations were defined by fluorescence intensity after exclusion of dead cells and doublets by viability dye and physical parameters: FSC: forward scatter, SSC: sideward scatter, W: width, A: Area. (C): In addition, monocytes were isolated from Peripheral Blood Mononuclear Cells obtained from whole blood defined as classical monocytes (1, CD45<sup>+</sup> CD11b<sup>+</sup> CX<sub>3</sub>CR1<sup>+</sup> CD14<sup>++</sup> CD16<sup>-</sup>), intermediate monocytes (2, CD45<sup>+</sup> CD11b<sup>+</sup> CX<sub>3</sub>CR1<sup>+</sup> CD14<sup>+</sup> CD16<sup>+</sup>), and non-classical monocytes (3, CD45<sup>+</sup> CD11b<sup>+</sup> CX<sub>3</sub>CR1<sup>+</sup> CD14<sup>-</sup> CD16<sup>++</sup>).

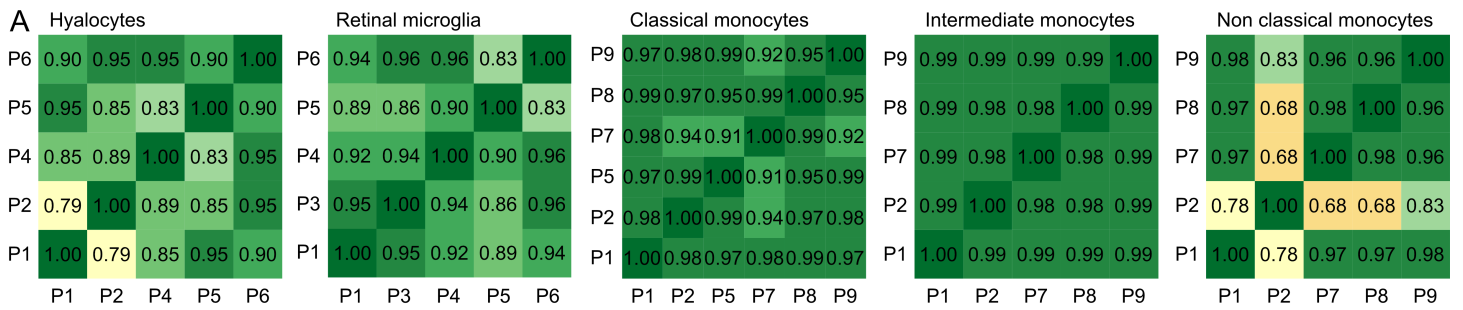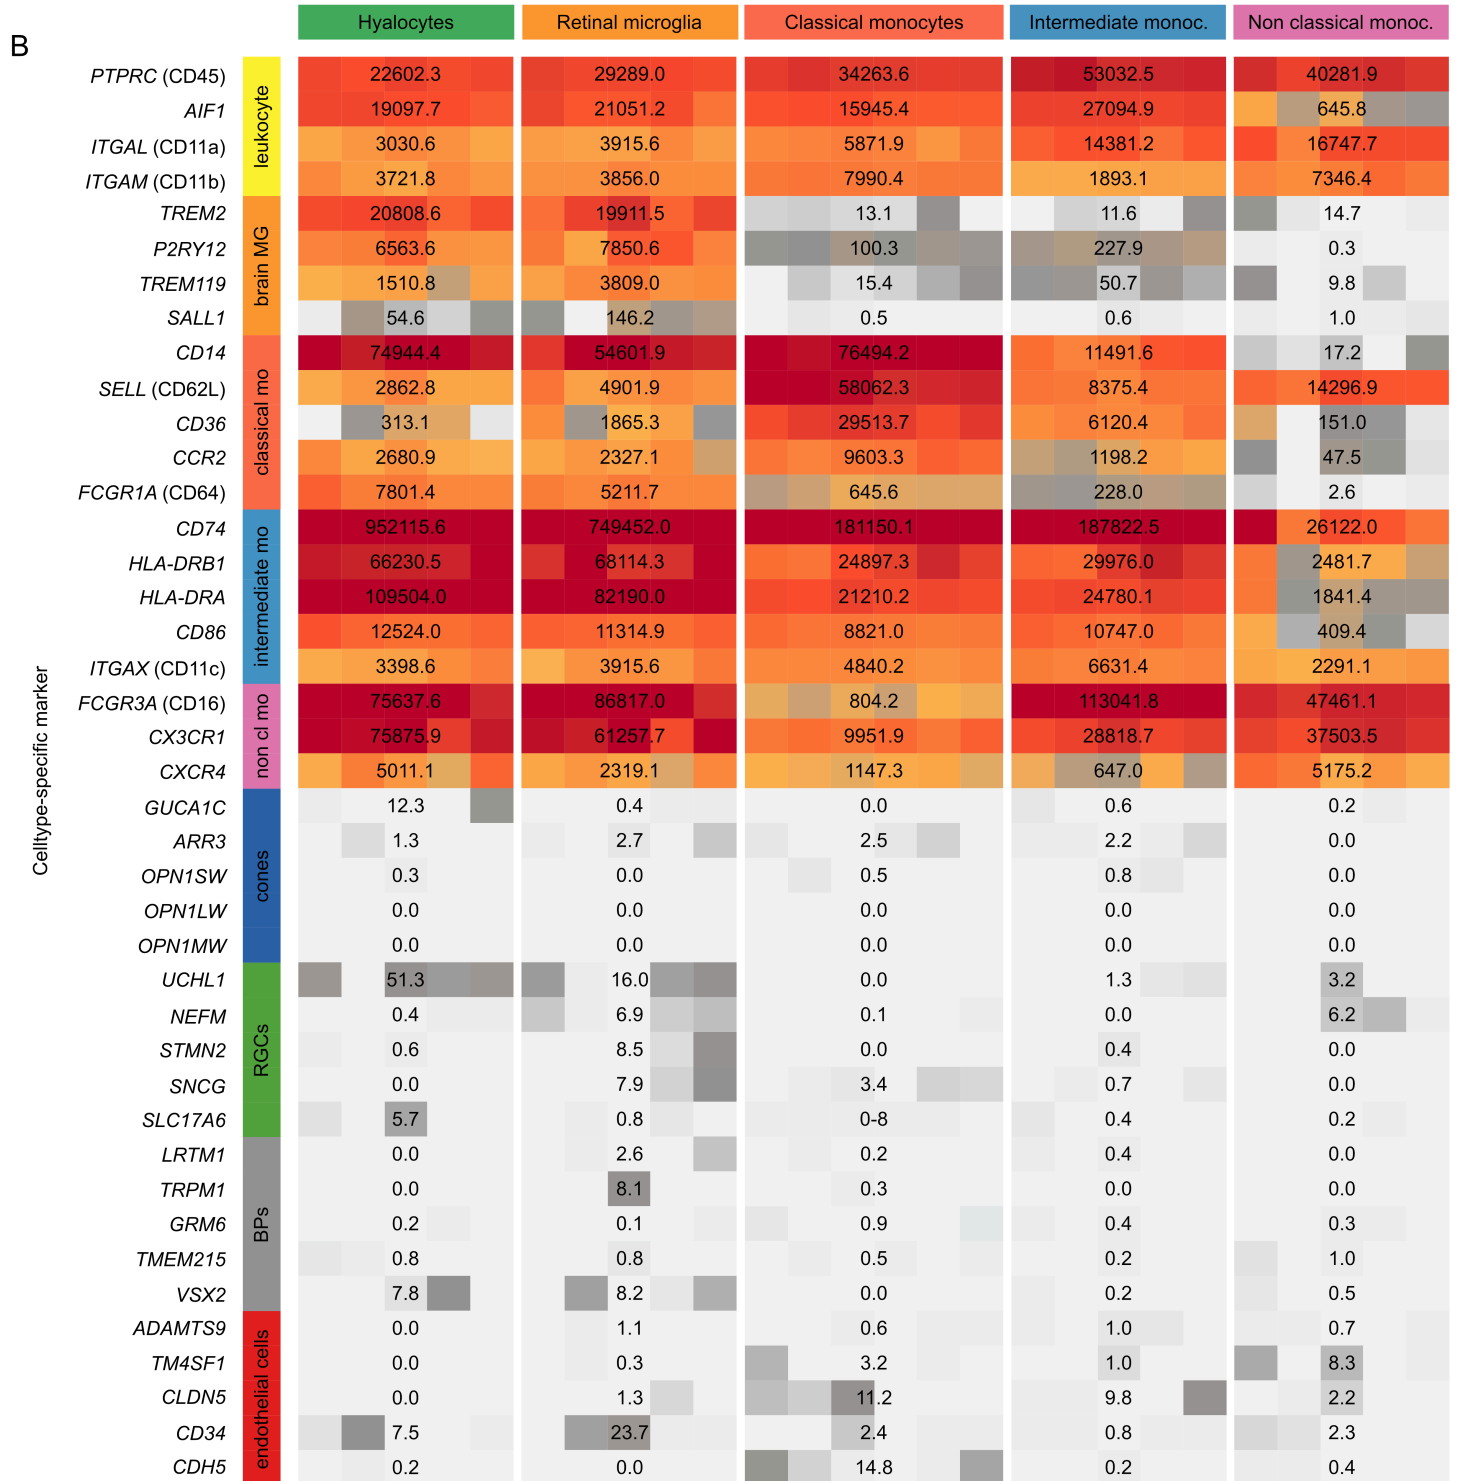

**Supplementary figure 3:** Quality and purity check. (A): Correlation plots visualizing Pearson correlation coefficients between any two patients (P) for all cell populations. (B): Expression of known celltype-specific marker genes in all 5 immune cell populations. Each column represents one cell population and each row one marker gene. Groups of marker genes are visualized for each celltype in the row annotation on the left. Numbers correspond to mean of normalized reads per group. Abbreviations: mo: monocyte, non cl: non classical, MG: microglia, RGC: retinal ganglion cell, BP: bipolar cell.

**A** Hyalocytes: enucleation versus vitrectomy

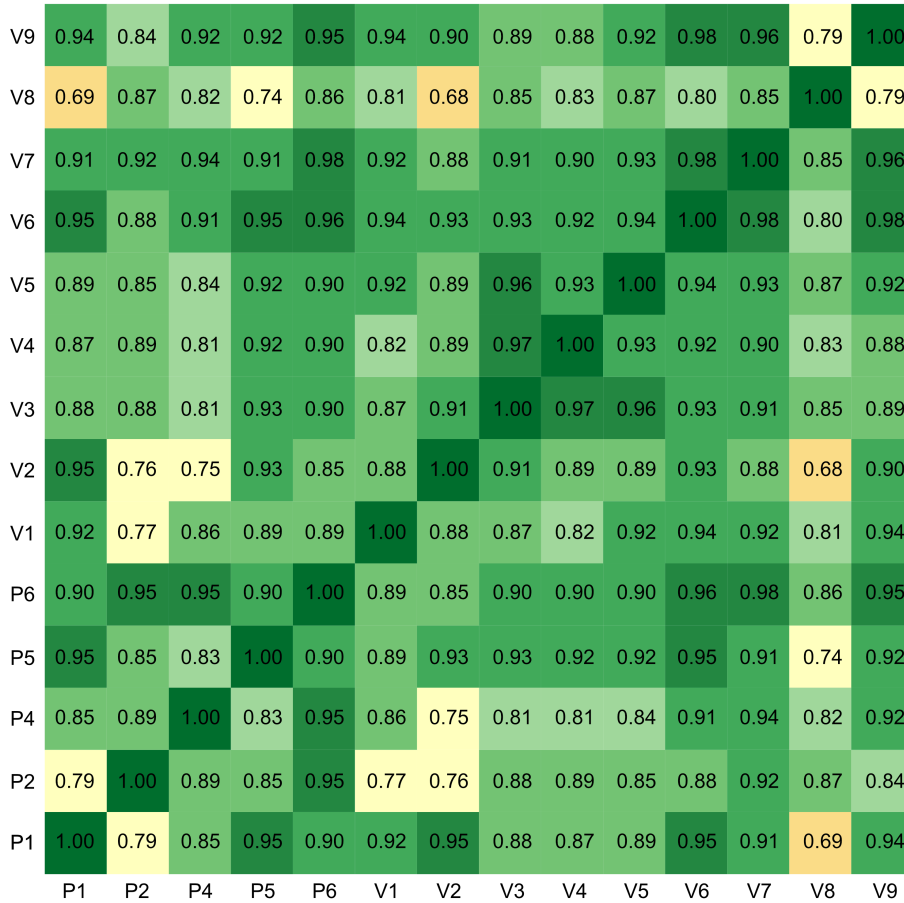

**B**

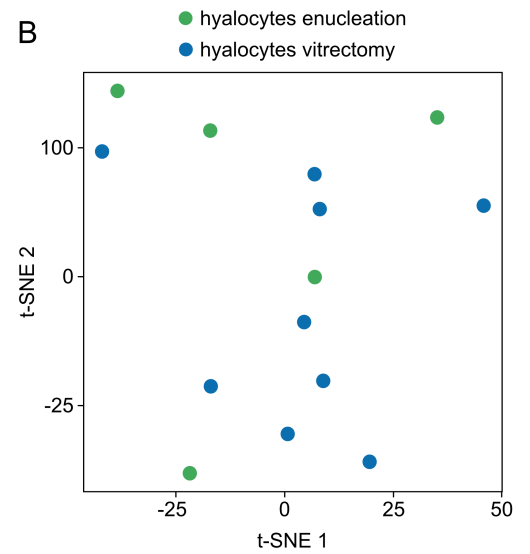

**Supplementary figure 4:** Comparison of transcriptional profiles of hyalocytes isolated from enucleated melanoma eyes (P1-6) and after vitrectomy (macular pucker, macular hole) (V1-9). (A): Correlation plots visualizing Pearson correlation coefficients between any two patients for hyalocytes from both groups. (B): Unsupervised cluster analysis using t-Distributed Stochastic Neighbor Embedding (t-SNE) of hyalocytes from melanoma eyes (enucleation) and after vitrectomy reveals no significant differences between the two groups.

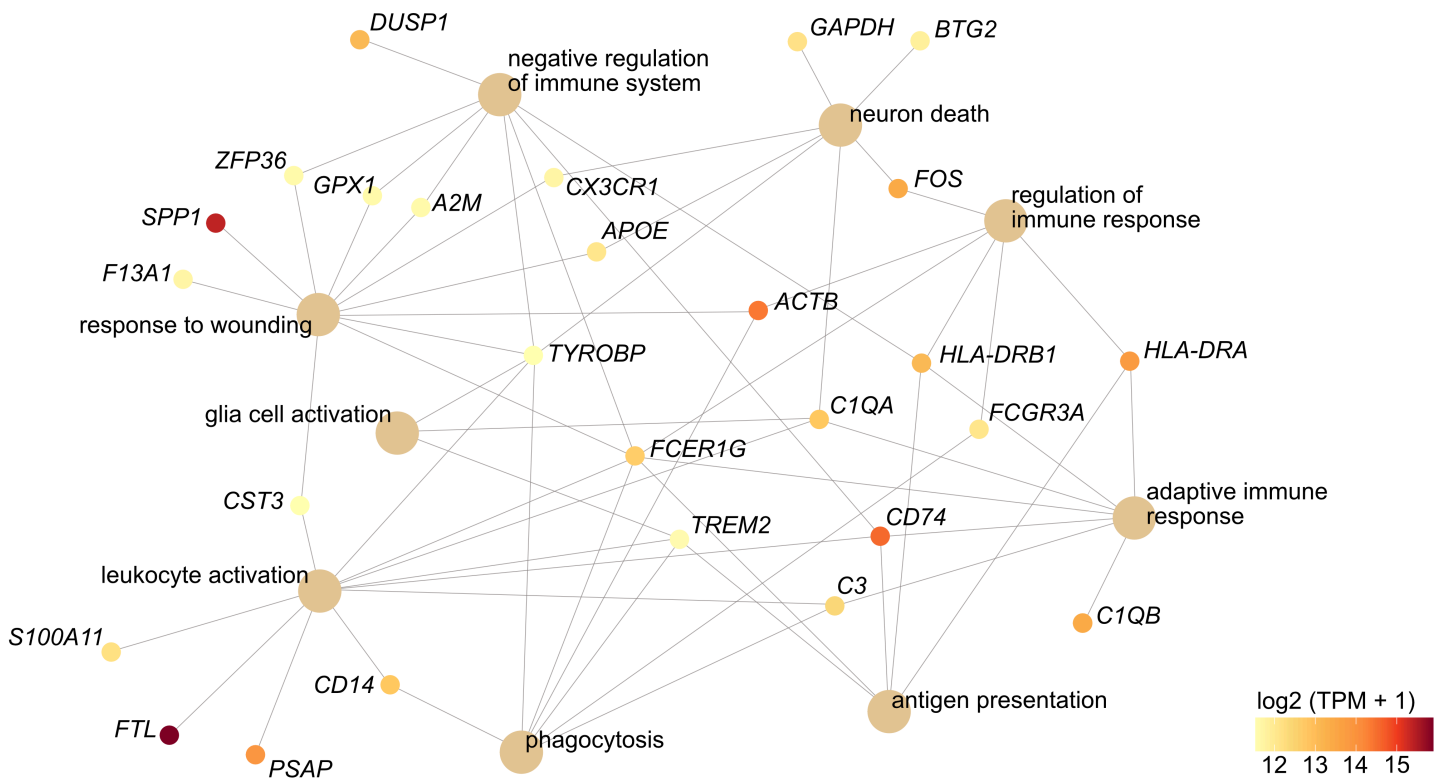

**Supplementary figure 5:** Network diagram illustrating the genes associated with the most significantly enriched GO biological processes in hyalocytes from Figure 1C, with the color representing the expression of each gene. TPM: transcripts per million.

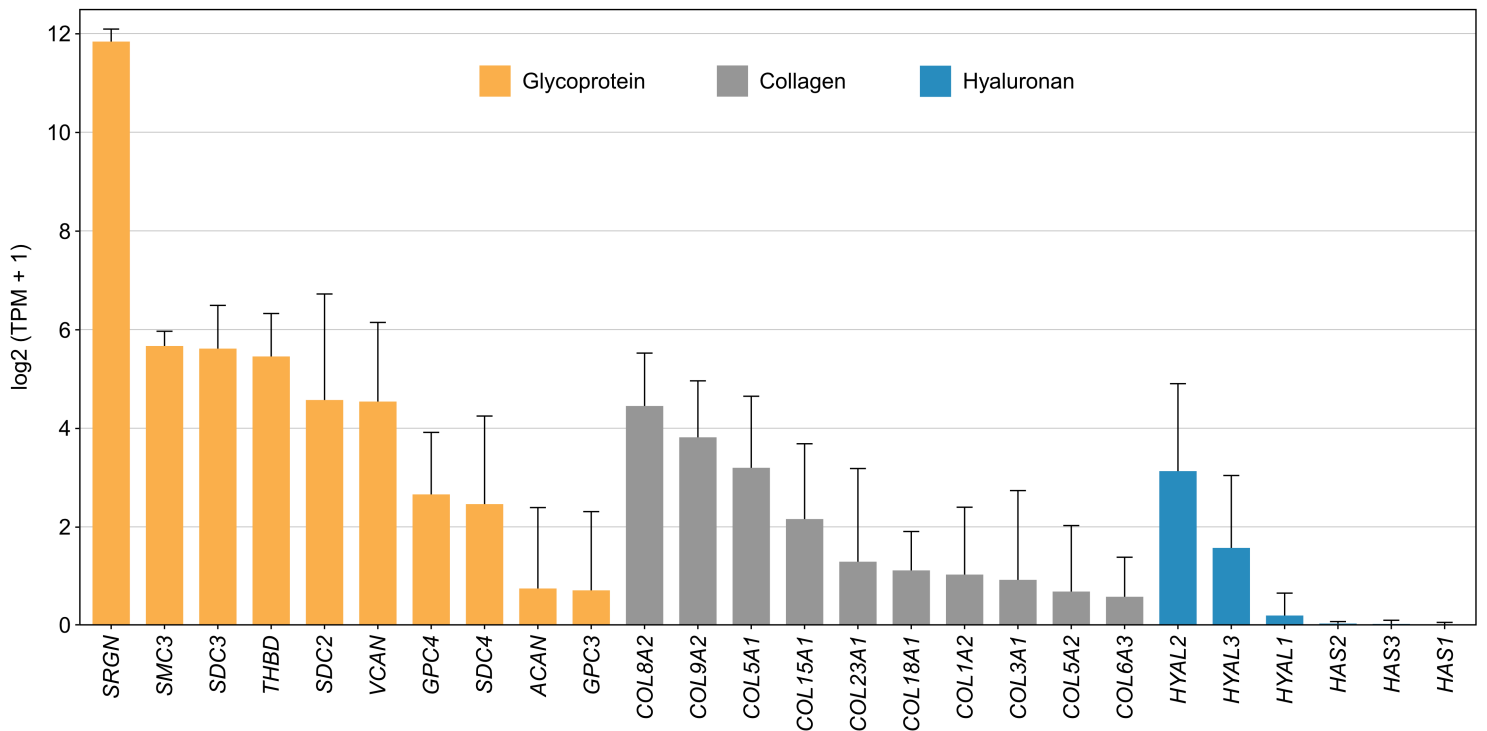

**Supplementary figure 6:** Expression of genes encoding for glycoproteins (yellow), collagen (grey) and hyaluronan (blue) in human hyalocytes. In each category, the ten highest expressed genes are visualized. Bar's height: mean expression, error bar: standard deviation. TPM: transcripts per million.
